# Supplementary material for: Bio-mineralization of virus-like particles by metal–organic framework nanoparticles enhances the thermostability and immune responses of the vaccines
Source: Royal Society of Chemistry journal article supplement (doi:10.1039/d1tb02719k), 2022-01-01
Supplement: d1tb02719k2.pdf [file d1tb02719k2.pdf]

---

| Immune group | Biochemical molecules      | Detection value | Reference  |
|--------------|----------------------------|-----------------|------------|
| VLPs         | Aspartate aminotransferase | 138.7           | 60.0-220.0 |
|              | Creatine kinase            | 841.2           | 5.0-1000.0 |
|              | Creatinine                 | 25.6            | 22.0-97.0  |
|              | Total bilirubin            | 14.94           | 2.00-20.00 |
| VLPs-ZIF-8   | Aspartate aminotransferase | 98.2            | 60.0-220.0 |
|              | Creatine kinase            | 443.7           | 5.0-1000.0 |
|              | Creatinine                 | 24.3            | 22.0-97.0  |
|              | Total bilirubin            | 11.05           | 2.00-20.00 |
| VLPs-ISA206  | Aspartate aminotransferase | 104.0           | 60.0-220.0 |
|              | Creatine kinase            | 396.4           | 5.0-1000.0 |
|              | Creatinine                 | 23.4            | 22.0-97.0  |
|              | Total bilirubin            | 13.40           | 2.00-20.00 |

---
